# Supplementary material
Source: PubMed Central journal article supplement (PMC3092212)
Supplement: supp_1947601910373794_DS_10.1177_1947601910373794_FigsS1-S7.pdf [file supp_1947601910373794_DS_10.1177_1947601910373794_FigsS1-S7.pdf]

## Legends of Supplemental Figures

**Figure S1. Methylation status of the -553/-441 region region of the *hoxa2* promoter by bisulfite sequencing.** Open circle:unmethylated, black circle: methylated

**Figure S2. mMTase activity of the recombinant proteins used.**

mMTase activities were assessed by Dnmt Magnetic beads (DMB) assays and the measurement of <sup>3</sup>H-incorporation in eight double-strand hemi-methylated probes.

**Figure S3. SDS-PAGE and SyproRuby staining (Invitrogen, France) illustrating the fusion protein purification.**

**Figure S4. Example of data obtained by using the transcription factor array with the Dnmt1 recombinant protein.**

Interaction analysis was done for 10 min exposition. If no signal was observed, proteins were considered to not interact in our acellular system with the Dnmt1 recombinant protein. Thus, we here observed that Sp1 and YY1 interacted with the Dnmt1 recombinant protein, while Sp4 not interacted with the Dnmt1 recombinant protein Neg: negative control, Pos: Positive control.

**Figure S5. Estimation of the Sp1 quantity interacting with Dnmt1.**

Nucleus/DNA were stained by DAPI (Blue), and Sp1 or Dnmt1/Sp1 interactions were visualized by red fluorescence.

**Figure S6. Identification of several molecular actors implicated in the DNA methylation of ZNF215.**

Chromatin ImmunoPrecipitation (ChIP) experiments was performed to determine the presence of Dnmt1, Dnmt3a or Dnmt3b on the -801/-693 region of the ZNF215 promoter. Re-Chromatin ImmunoPrecipitation (Re-ChIP) experiments was performed to determine the presence of the considered proteins on indicated genes.

**Figure S7. Identification of several molecular actors implicated in the DNA methylation of several DNA repeat elements.**

Chromatin ImmunoPrecipitation (ChIP) and Re-Chromatin ImmunoPrecipitation (Re-ChIP) experiments were performed to determine the presence of the considered proteins on indicated genes.

**Sequences of probes used in DMB assays.**

Each probes are composed by the repetition (ten fold) of the sequence indicated in table below. Biotin-tag is added in 5' extremity.

| <b>Probe</b>      | <b>sequence</b> |
|-------------------|-----------------|
| #1                | attcgagt        |
| #2                | tgacgtaa        |
| #3                | aaccggtt        |
| #4                | ggccgcca        |
| #4 <sup>mut</sup> | ggcagcca        |
| #5                | actcgtca        |
| #6                | tagcgttc        |
| #7                | gtacgaca        |
| #8                | cttcggag        |

**Hervouet *et al.* - Dnmt1/Transcription Factor Interactions**

**List of antibodies.**

| <b>antibody</b> | <b>reference</b>  |
|-----------------|-------------------|
| Dnmt1           | Abcam#ab16632     |
| Dnmt3a          | Abcam#ab13888     |
| Dnmt3b          | Tebu-Bio#sc20704  |
| PCNA            | Abcam#Ab18197     |
| UHRF1           | Tebu-Bio#sc100606 |
| SP1             | Tebu-Bio#sc59     |
| GFP             | Tebu-Bio#sc9996   |
| p53             | Tebu-Bio#sc71817X |
| YY1             | Tebu-Bio#sc9996   |
| C-EBP $\alpha$  | Tebu-Bio#sc9314   |
| GATA1           | Tebu-Bio#sc265    |
| ISGF3           | Tebu-Bio#sc10793X |
| c-ETS2          | Tebu-Bio#sc22803X |
| AP2 $\alpha$    | Tebu-Bio#sc55485  |

**Hervouet *et al.* - Dnmt1/Transcription Factor Interactions**

**Primers list**

|         | MSP                                                                                                                                                                                                                                                                                                                                                                     | MSRA                                                                                                                | ChIP/MeDIP                                       |
|---------|-------------------------------------------------------------------------------------------------------------------------------------------------------------------------------------------------------------------------------------------------------------------------------------------------------------------------------------------------------------------------|---------------------------------------------------------------------------------------------------------------------|--------------------------------------------------|
| SLIT2   | Us:GTGAGTAGAGTTTAGAGTTGTGTGT<br>Uas:TCTCAATAAATATTATAACCCCAAT<br>Ms:GAGTGAGTAGAGTTTAGAGTCGTGCG<br>Mas:TCTCAATAAATATTATAACCCCGAT<br>MSPabcd-S:AAGTGTATGTGTGTTTGTAAT<br>MSPaUAS:TCCAAAACTAAAAACACAAAAA<br>MSPaMas:TCCgAAAACTAAAAACgCgAAAA<br>MSPbUas: CCAATCAAAATAAACTCC<br>MSPbMas: CCCgATCAAAATAAACTCC<br>MSPcUas:ATCCAATACCAATAACAAAA<br>MSPcMas: ATCCgATACCAATAACgAAA | BstUI<br>S: TCTGCTACGGGCCCGCT<br>AS: CCACGCACGCTTCTGC<br><br>DpnI<br>S: CCAGAACTGCGCGTCC<br>AS: CAATAGGTATTATGGCCCC | S: GGCTCCGCGCCTTCTA<br>AS: CCACGCACGCTTCTGC      |
| HOXA2   | Ms: ATAGAATTTATGTGGTTGGGACGT<br>Us: AATAGAATTTATGTGGTTGGGATGT<br>Mas: TACGCGAATATAAACCTACTATCG<br>Uas: CACAAATATAAACCTACTATCAAT                                                                                                                                                                                                                                         |                                                                                                                     | S: CCGACAGTCCCAAACAAT<br>AS: GTGTGAATGTGCGCGAGT  |
| TNFSF10 | Ms: TAAGAGGATTATTTGAGGTTAGGAGTTC<br>Us: TAAGAGGATTATTTGAGGTTAGGAGTTT<br>Mas: CAATAATACAATAACACAATCTCGAC<br>Uas: CAATAATACAATAACACAATCTCAAC                                                                                                                                                                                                                              |                                                                                                                     | S: GAATCTGGGAGGTGGAG<br>AS: TTTGACAGAATCTCACTTT  |
| LINE-1  |                                                                                                                                                                                                                                                                                                                                                                         |                                                                                                                     | S: AGTGCTTAAAGGAGCTGA<br>AS: TTGCTGATACCCTTTCTTC |

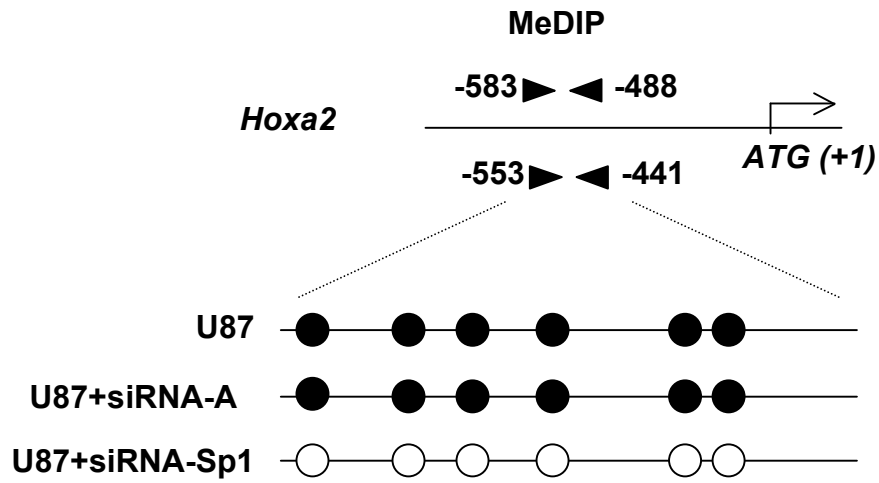

Primers for bisulfite sequencing are designed by using the MethPrimer program: S: GGGGGAGGTAGAGGGTAGTTAT and AS: CCTCCTAATCTACAAAAATCTATCTAATAT

Figure S1

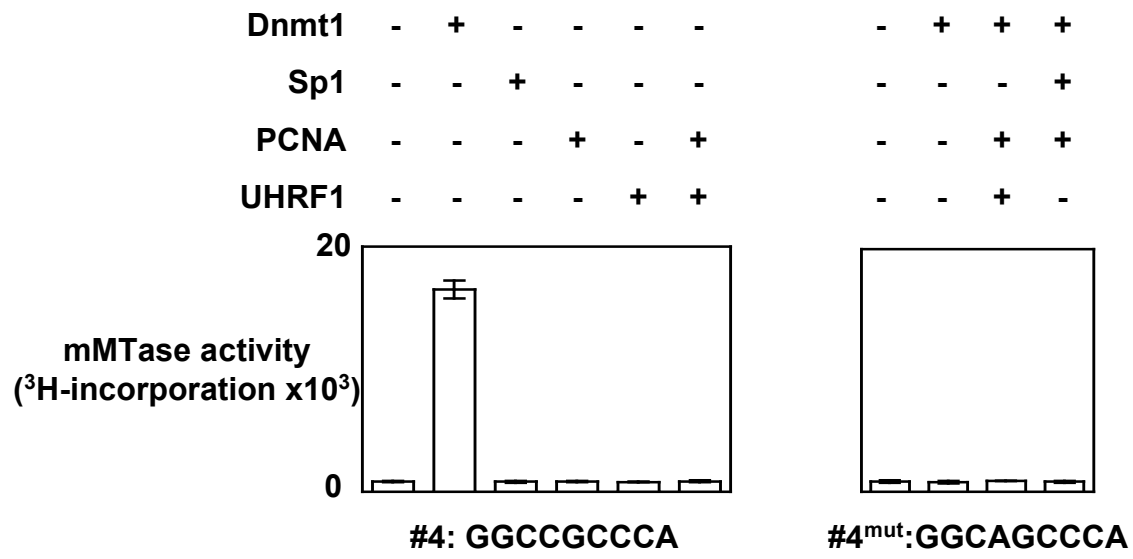

Figure S2

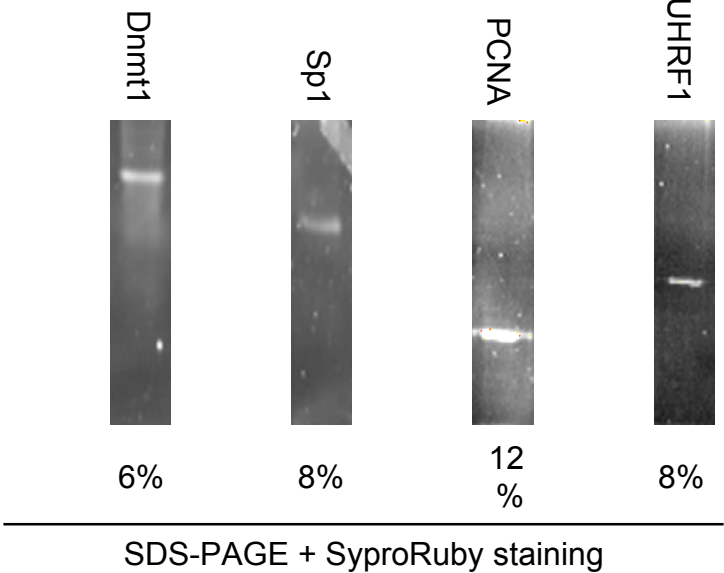

Figure S3

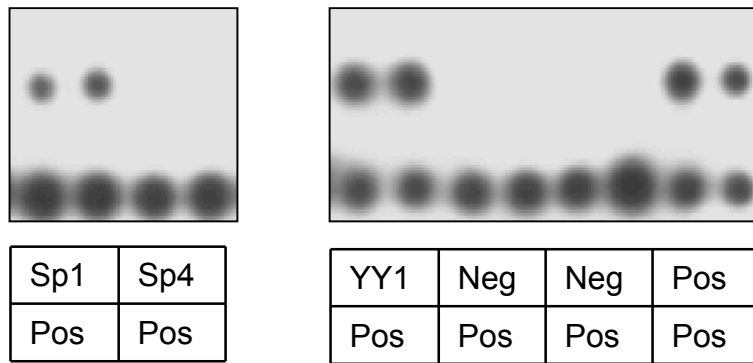

**Figure S4**



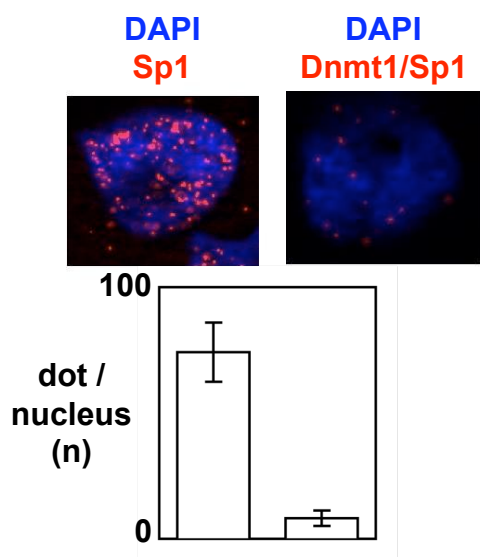

Figure S5

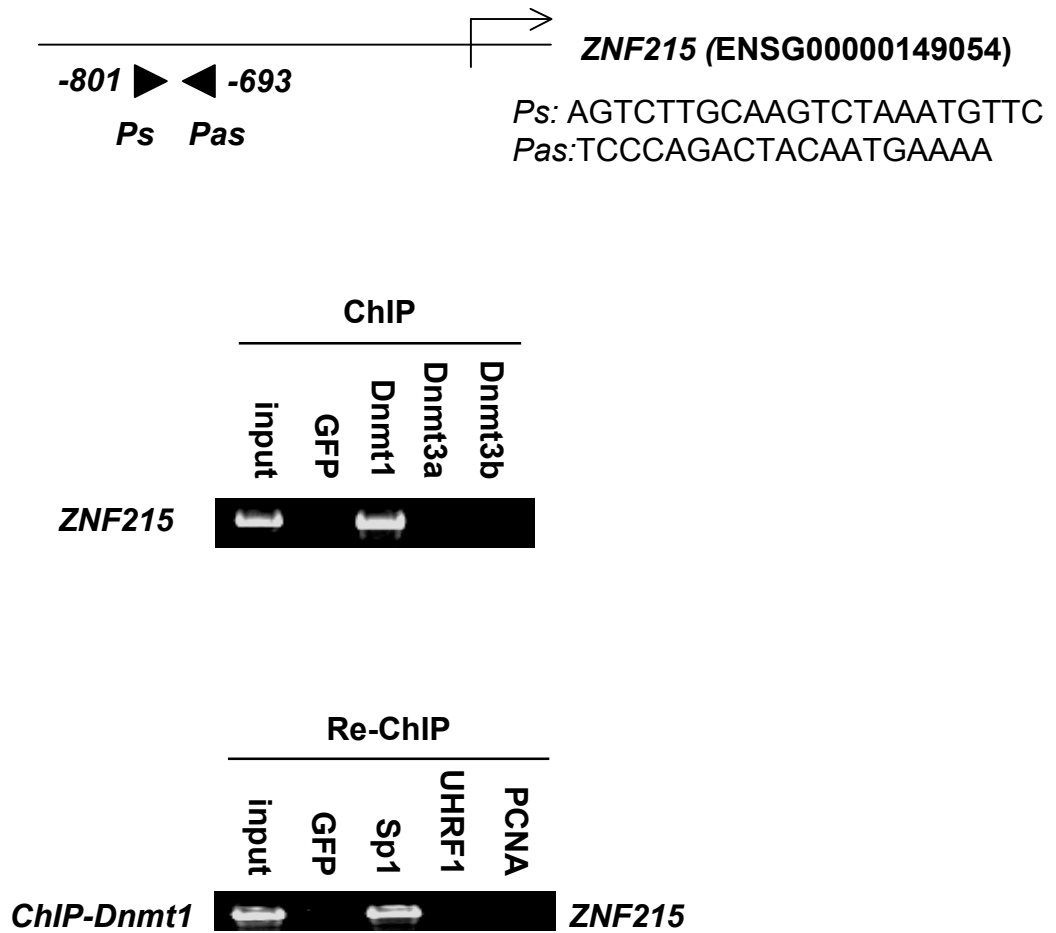

Figure S6

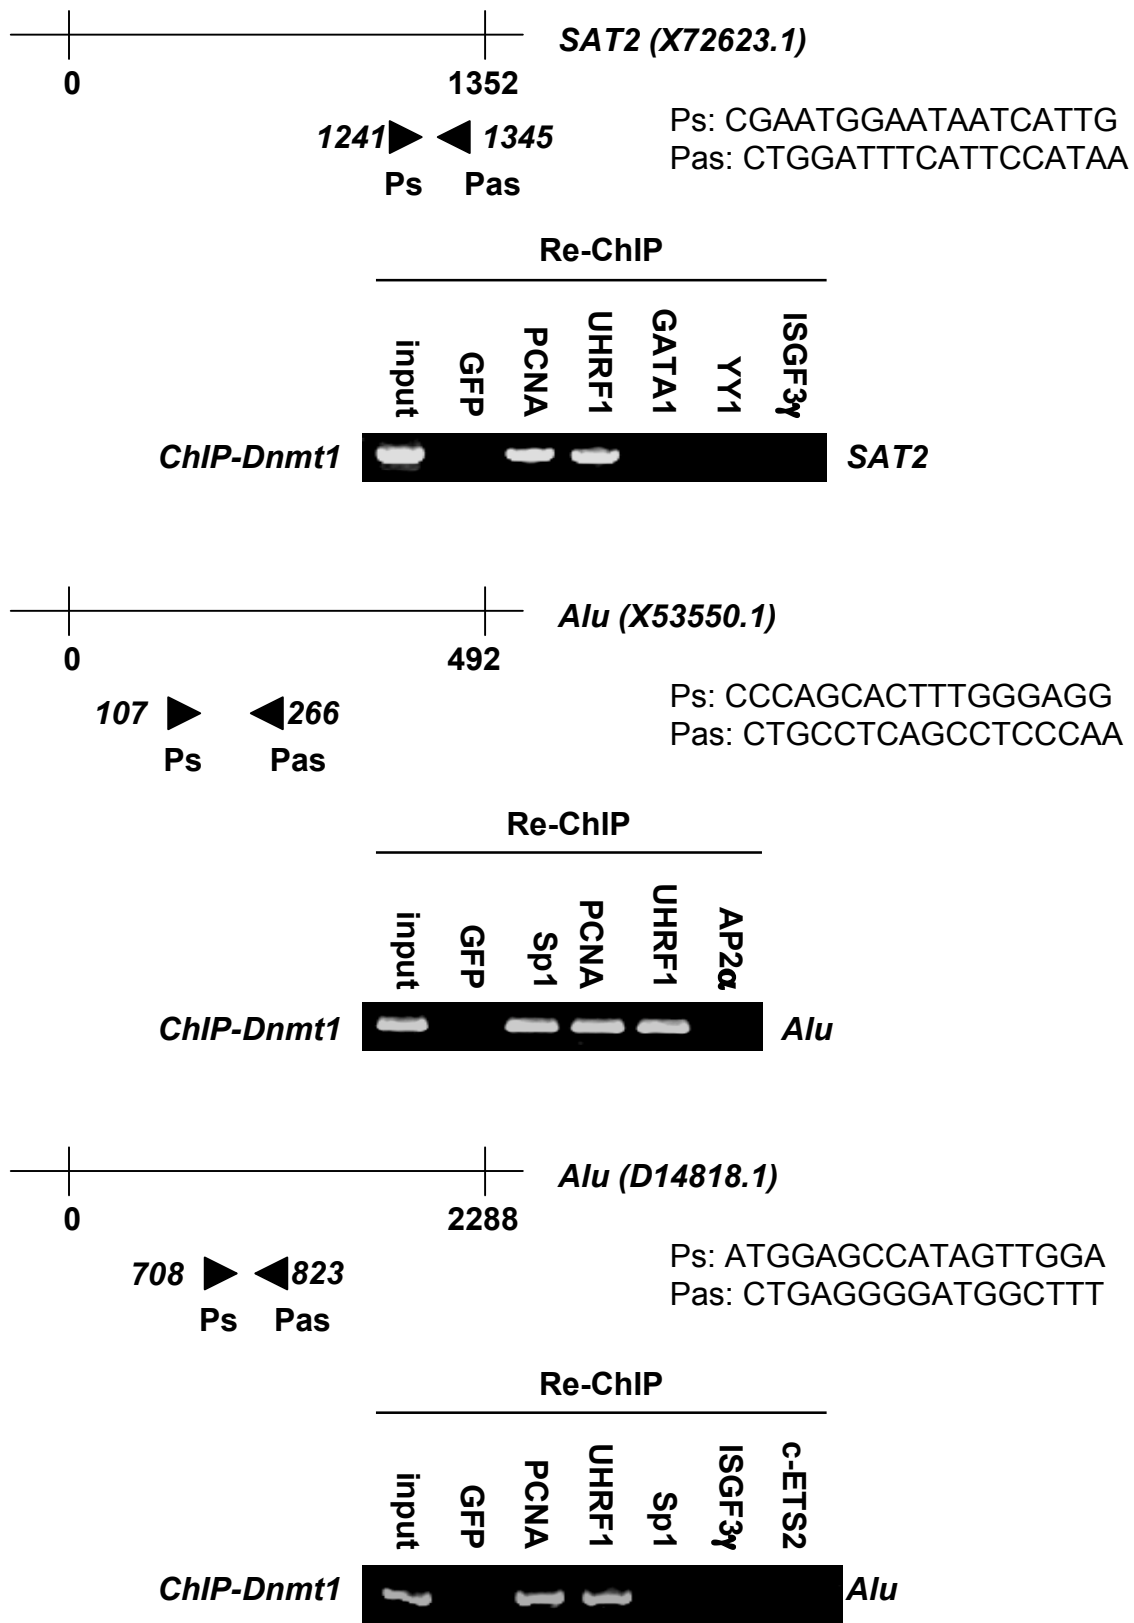

**Figure S7**
